# Supplementary material for: Searching of potential energy curves for the benzene dimer using dispersion-corrected density functional theory
Source: Royal Society of Chemistry journal article supplement (doi:10.1039/b717983a), 2008-01-01

## Searching of potential energy curves for the benzene dimer using dispersion corrected density functional theory

**B717983A**

**Prakash Chandra Jha,\*<sup>a</sup> Zilvinas Rinkevicius,<sup>a</sup> Hans Ågren,<sup>a</sup> Prasenjit Seal<sup>b</sup> and  
Swapan Chakrabarti\*<sup>b</sup>**

<sup>a</sup> *Department of Theoretical Chemistry, School of Biotechnology,*

*Royal Institute of Technology, S-106 91 Stockholm, Sweden*

*Fax: +46 8 5537 8590*

*E-mail: [prakash@theochem.kth.se](mailto:prakash@theochem.kth.se)*

<sup>b</sup> *Department of Chemistry, University of Calcutta*

*92 -A. P. C. Ray Road, Kolkata 700009, India*

*Fax: 91-33-23519755*

*E-mail: [swpanchem@yahoo.co.in](mailto:swpanchem@yahoo.co.in)*

**Fig. S1 Comparison in the potential energy curves (PEC) for parallel-displaced benzene dimer between the present theoretical results with that of counterpoise-corrected estimated CCSD(T) results of Sinnokrot et al.[ M. O. Sinnokrot and C. D. Sherrill, *J. Phys. Chem. A*, 2004, 108, 10200] Here  $r_1$  represents the vertical displacement while  $r_2$  represents the horizontal displacement of benzene dimer.**

**Fig. S2 Comparison in the potential energy curves (PEC) for parallel-displaced benzene dimer between the present theoretical results with that of counterpoise-corrected MP2 results of Sinnokrot et al.[ M. O. Sinnokrot and C. D. Sherrill, *J. Phys. Chem. A*, 2004, 108, 10200] Here  $r_1$  represents the vertical displacement while  $r_2$  represents the horizontal displacement of benzene dimer.**

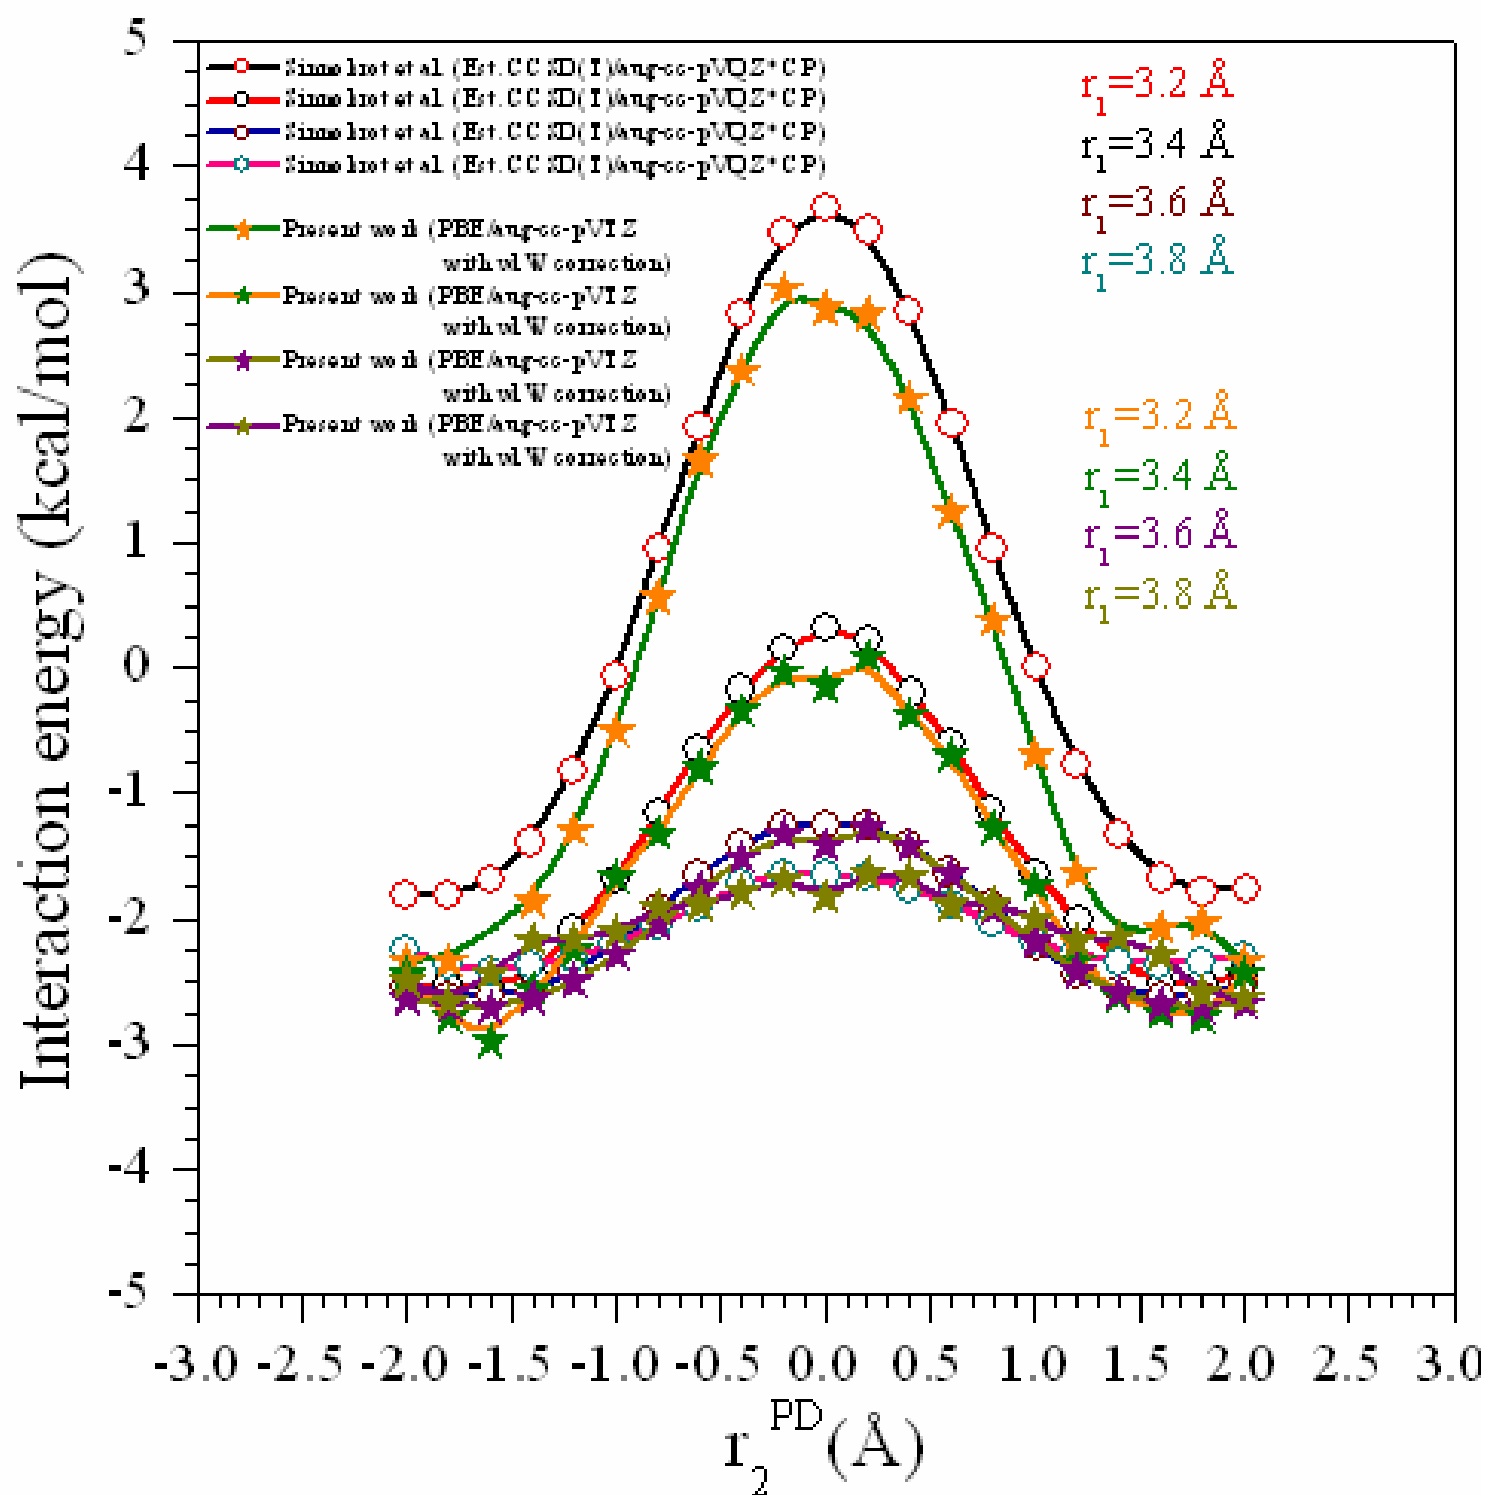

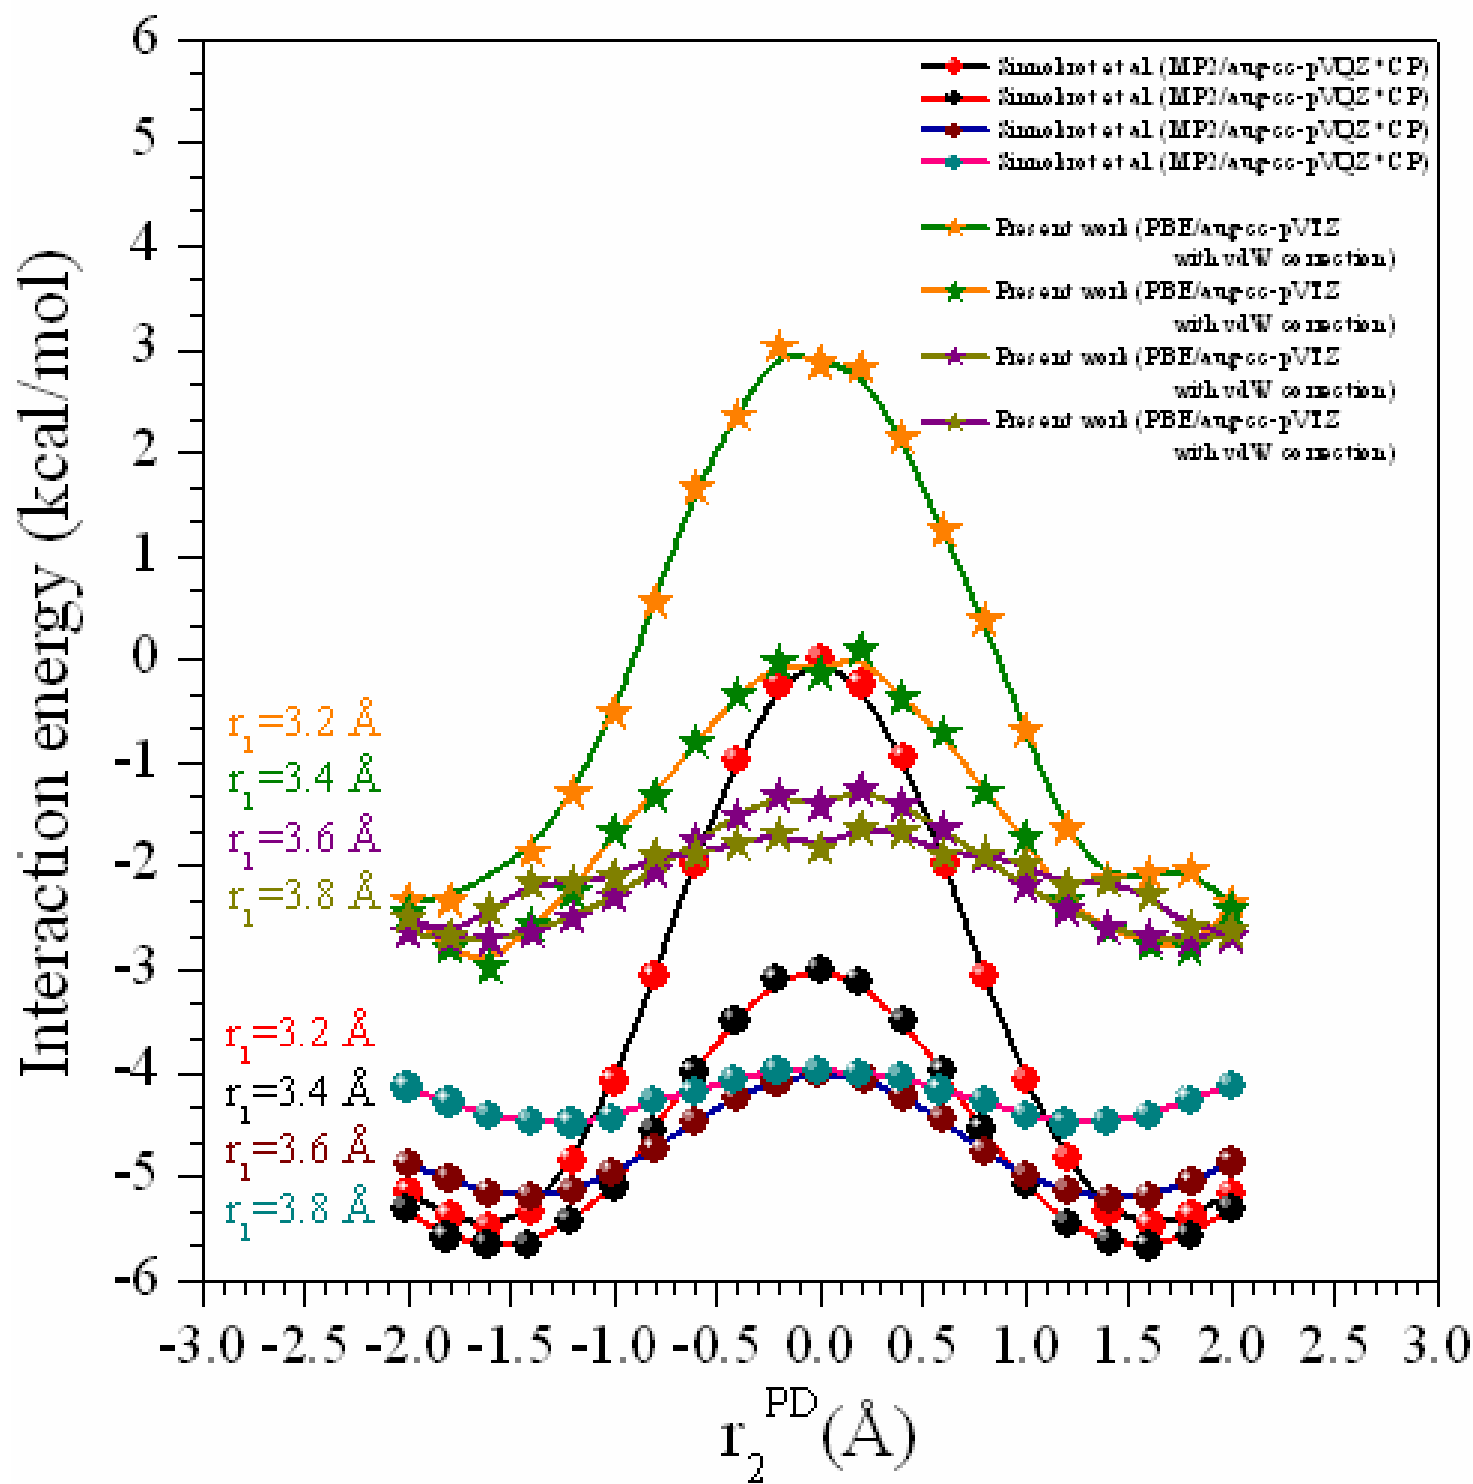

Supplement: b717983a.pdf [file b717983a.pdf]
